# Supplementary material for: Bioinformatics analysis and validation of mesenchymal stem cells related gene MT1G in osteosarcoma
Source: publisher site journal article supplement (doi:10.18632/aging.205809), 2024-05-13
Supplement: Supplementary file [file aging-v16i9-205809-supplementary-material-SD1.pdf]

SUPPLEMENTARY FIGURE

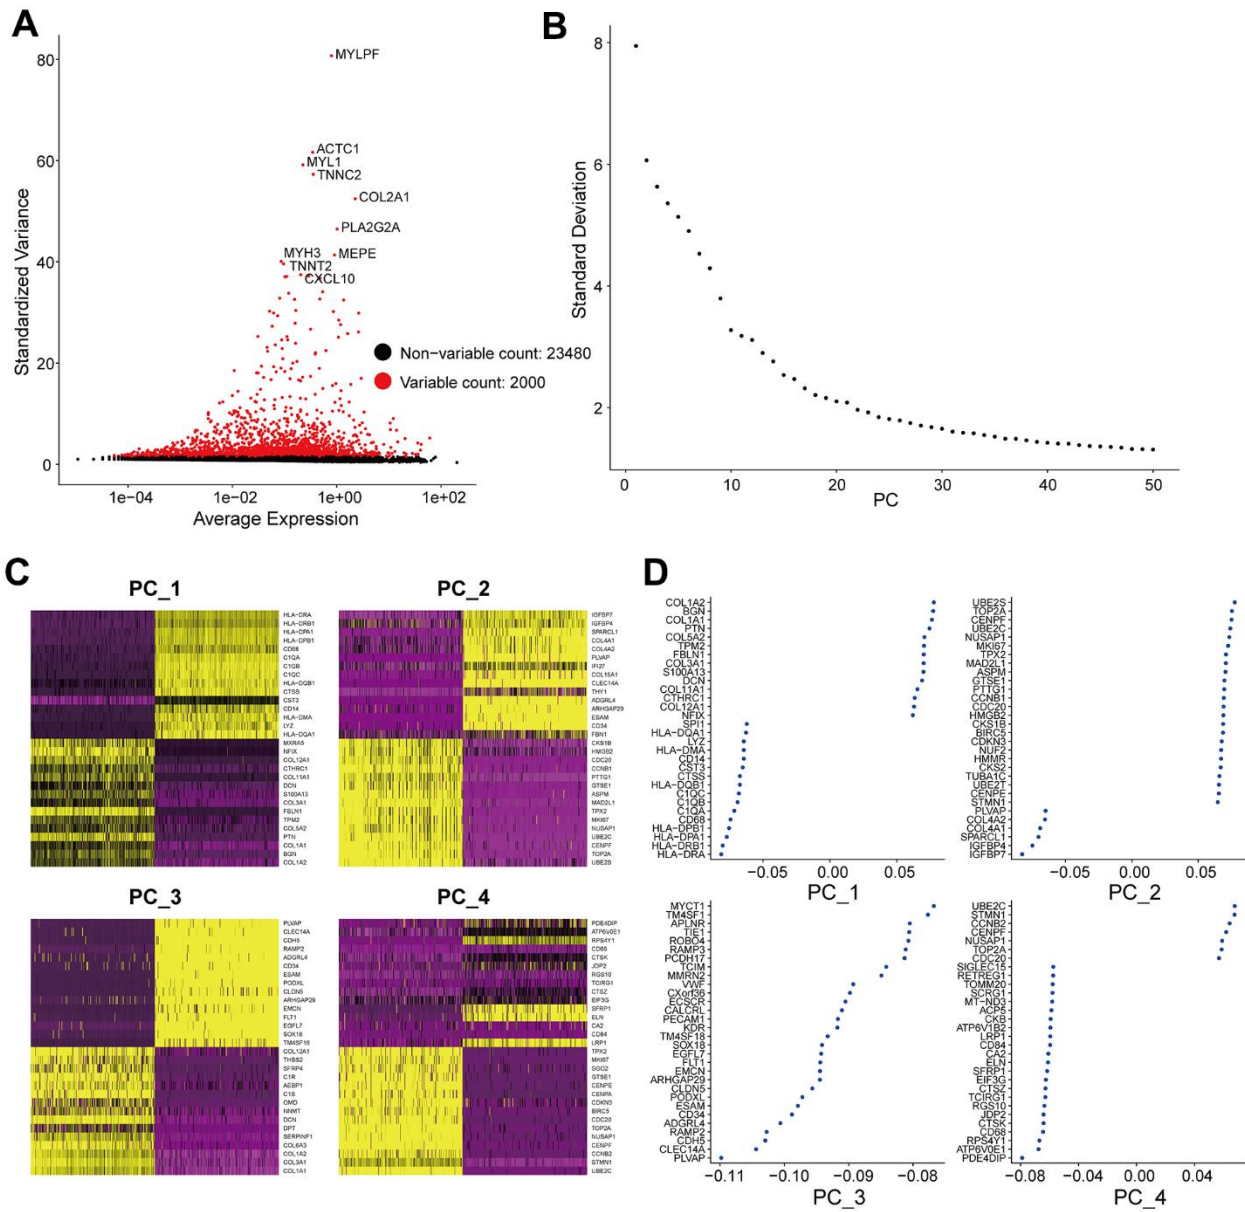

**Supplementary Figure 1. Processing of single-cell RNA-seq data.** (A) The characteristic variance diagram of the gene symbols. Each spot represented a gene. Red spots represented highly variable genes with significant differences across cells. (B) Principal component sorting elbow graph based on the percentage of variance explained by each one. (C) Cluster analysis across each component. The colors ranging from purple to golden yellow represented the expression levels of correlated genes from low to high. (D) Correlation analysis of the most altered genes in each component.
