# Supplementary material for: Bioinformatics analysis and validation of mesenchymal stem cells related gene MT1G in osteosarcoma
Source: Aging (Albany NY). 2024 May 13;16(9):8155–70. doi: 10.18632/aging.205809 (PMC11131992; doi:10.18632/aging.205809)
Supplement: Supplementary Table 9 [file aging-16-205809-s010.xls]

## Sheet: Table S9
Supplementary Table 9. The results of GO analysis (Cellular Component) in TARGET data set.
geneSet	description	size	overlap	expect	enrichmentRatio	pValue	FDR	userId
GO:0031226	intrinsic component of plasma membrane	1673	53	25.1958	2.10353	1.35e-07	0.000111	F2R;HRH2;CNR1;SIGMAR1;GPER1;IL27RA;KCNMA1;SLC16A1;CD320;DRD2;SNAP25;ASGR1;LTB4R;LRRN4;SCARB1;KCNJ3;PCDHA5;ITGA9;MUC12;SLCO5A1;TACR1;SLC39A14;PRSS27;IL2RB;SLCO3A1;EPHA6;IL1RAP;TMEM130;TRPA1;GPR35;SLC4A3;EPOR;TRABD2A;CLEC2D;ADORA2A;SLC38A2;ACKR2;CDH2;SEMA6B
GO:0005887	integral component of plasma membrane	1596	51	24.0361	2.1218	1.88e-07	0.000111	F2R;HRH2;CNR1;SIGMAR1;GPER1;IL27RA;KCNMA1;SLC16A1;CD320;DRD2;SNAP25;ASGR1;LTB4R;LRRN4;SCARB1;KCNJ3;PCDHA5;ITGA9;MUC12;SLCO5A1;TACR1;SLC39A14;IL2RB;SLCO3A1;EPHA6;IL1RAP;TMEM130;TRPA1;GPR35;SLC4A3;EPOR;TRABD2A;CLEC2D;ADORA2A;SLC38A2;ACKR2;CDH2;SEMA6B;KCNC3;
GO:0045121	membrane raft	311	15	4.68373	3.20257	7.9e-05	0.0149771	F2R;CNR1;STOML2;KCNMA1;LTB4R;SCARB1;BCL10;RAB5A;DLC1;SPRED1;CDH2;EFNB1;ADD1;ADCY2;TGFBR2
GO:0098857	membrane microdomain	312	15	4.6988	3.19231	8.19e-05	0.0149771	F2R;CNR1;STOML2;KCNMA1;LTB4R;SCARB1;BCL10;RAB5A;DLC1;SPRED1;CDH2;EFNB1;ADD1;ADCY2;TGFBR2
GO:0031514	motile cilium	178	11	2.68072	4.10337	8.32e-05	0.0149771	INTU;DRD2;SPAG17;TACR1;SPEF1;CFAP69;DNAH2;ALS2CR12;WBP2NL;PMFBP1;AK2
GO:0044463	cell projection part	1425	40	21.4608	1.86386	9.44e-05	0.0149771	HRH2;CNR1;SIGMAR1;GPER1;INTU;DRD2;KIF21B;SNAP25;SPAG17;TSHZ3;SCARB1;TACR1;HPCA;CLUAP1;NTF3;RAB5A;SPEF1;VASP;NPTXR;CFAP69;DNAH2;PSD3;ADORA2A;DLC1;SLC38A2;SOD1;PLB1;HSPB11;MYH14;CFAP221;INPP5J;KCNC3;LZTS1;VAMP2;ADCY2;SSH1;PDE4B;PMFBP1;RILP;AK2
GO:0120038	plasma membrane bounded cell projection part	1425	40	21.4608	1.86386	9.44e-05	0.0149771	HRH2;CNR1;SIGMAR1;GPER1;INTU;DRD2;KIF21B;SNAP25;SPAG17;TSHZ3;SCARB1;TACR1;HPCA;CLUAP1;NTF3;RAB5A;SPEF1;VASP;NPTXR;CFAP69;DNAH2;PSD3;ADORA2A;DLC1;SLC38A2;SOD1;PLB1;HSPB11;MYH14;CFAP221;INPP5J;KCNC3;LZTS1;VAMP2;ADCY2;SSH1;PDE4B;PMFBP1;RILP;AK2
GO:0031252	cell leading edge	393	17	5.91867	2.87226	0.000102	0.0149771	NHS;GPER1;SLC39A14;HPCA;RAB5A;VASP;SH3BP1;PSD3;ADORA2A;DLC1;PDLIM7;CDH2;INPP5J;KCNC3;ABLIM3;SSH1;ARAP3
GO:0098589	membrane region	324	15	4.87952	3.07407	0.000125	0.0158628	F2R;CNR1;STOML2;KCNMA1;LTB4R;SCARB1;BCL10;RAB5A;DLC1;SPRED1;CDH2;EFNB1;ADD1;ADCY2;TGFBR2
GO:0045202	synapse	1154	34	17.3795	1.95633	0.000135	0.0158628	MCTP2;F2R;CNR1;SIGMAR1;SYN3;SV2C;GPER1;KCNMA1;SLC16A1;DRD2;SNAP25;KCNJ3;HPCA;NTF3;RAB5A;BCL11A;TSC2;NPTXR;IL1RAP;PSD3;ADORA2A;CDH2;KCNC3;LZTS1;VAMP2;EFNB1;ABLIM3;ADD1;COLQ;GABRR3;CADM1;PDE4B;EGFLAM;CHRNA6
GO:0044853	plasma membrane raft	106	8	1.59639	5.01132	0.000201	0.0214819	F2R;KCNMA1;SCARB1;DLC1;SPRED1;CDH2;ADD1;TGFBR2
GO:0005604	basement membrane	91	7	1.37048	5.10769	0.000448	0.0415552	TIMP3;LAMC1;LAMA4;SMOC1;LAMB1;COLQ;EGFLAM
GO:0062023	collagen-containing extracellular matrix	366	15	5.51205	2.72131	0.00046	0.0415552	COL5A3;TGFB1I1;PODNL1;TIMP3;LAMC1;LAMA4;AZGP1;SMOC1;LAMB1;SFRP1;ADAMTS15;CDH2;COLQ;GPC5;EGFLAM
GO:0044456	synapse part	921	27	13.8705	1.94658	0.000739	0.0583789	MCTP2;F2R;CNR1;SIGMAR1;SYN3;SV2C;GPER1;KCNMA1;DRD2;SNAP25;KCNJ3;HPCA;NTF3;RAB5A;BCL11A;TSC2;PSD3;ADORA2A;CDH2;KCNC3;LZTS1;VAMP2;ADD1;COLQ;GABRR3;PDE4B;CHRNA6
GO:0042734	presynaptic membrane	161	9	2.4247	3.7118	0.00076	0.0583789	CNR1;GPER1;DRD2;SNAP25;KCNJ3;ADORA2A;CDH2;KCNC3;CHRNA6
GO:0030426	growth cone	164	9	2.46988	3.6439	0.000866	0.0583789	CNR1;SIGMAR1;KIF21B;SNAP25;TSHZ3;NPTXR;MYH14;INPP5J;SSH1
GO:0098794	postsynapse	605	20	9.11145	2.19504	0.000879	0.0583789	F2R;SIGMAR1;SYN3;GPER1;KCNMA1;DRD2;SNAP25;HPCA;RAB5A;BCL11A;TSC2;PSD3;ADORA2A;CDH2;KCNC3;LZTS1;ADD1;GABRR3;PDE4B;CHRNA6
GO:0099056	integral component of presynaptic membrane	75	6	1.12952	5.312	0.000931	0.0583789	CNR1;DRD2;KCNJ3;ADORA2A;CDH2;CHRNA6
GO:0030427	site of polarized growth	166	9	2.5	3.6	0.000944	0.0583789	CNR1;SIGMAR1;KIF21B;SNAP25;TSHZ3;NPTXR;MYH14;INPP5J;SSH1
GO:0015629	actin cytoskeleton	482	17	7.25904	2.34191	0.00106362	0.0624874	STOML2;PLS1;AVIL;RAB5A;VASP;ACTR3B;DLC1;PDLIM7;MYH14;SPECC1;ACKR2;CDH2;ABLIM3;ADD1;NDC1;HFE;STK38L
GO:0150034	distal axon	280	12	4.21687	2.84571	0.00114927	0.0643044	CNR1;SIGMAR1;GPER1;DRD2;KIF21B;SNAP25;TSHZ3;RAB5A;NPTXR;MYH14;INPP5J;SSH1
GO:0005901	caveola	79	6	1.18976	5.04304	0.00122274	0.0653055	F2R;KCNMA1;SCARB1;DLC1;SPRED1;TGFBR2
GO:0031012	extracellular matrix	496	17	7.46988	2.27581	0.00144701	0.0705012	COL5A3;TGFB1I1;PODNL1;ELFN2;TIMP3;LAMC1;LAMA4;AZGP1;SMOC1;LAMB1;SFRP1;MATN3;ADAMTS15;CDH2;COLQ;GPC5;EGFLAM
GO:0030054	cell junction	1268	33	19.0964	1.72808	0.00148118	0.0705012	CCND1;FOCAD;ILDR1;SIGMAR1;NHS;SYN3;SV2C;GPER1;TMEM47;SLC16A1;TGFB1I1;SNAP25;HYOU1;ARL14EP;VASP;SH3BP1;CNN1;PSD3;CDK5RAP2;DLC1;CLDN6;PDLIM7;CDH2;CDH20;KCNC3;LZTS1;VAMP2;ADD1;COLQ;GABRR3;CADM1;EGFLAM;CHRNA6
GO:0048471	perinuclear region of cytoplasm	684	21	10.3012	2.0386	0.00164856	0.0705012	MT1X;MT1F;MT1H;MT1M;MT1E;MT2A;GPER1;CDKN3;SNAP25;CDC20;BCL10;TSC2;INHBA;ALDH1A2;LAMB1;CDK5RAP2;VAMP2;TENM1;MAD2L1;WBP2NL;HFE
GO:0008021	synaptic vesicle	180	9	2.71084	3.32	0.00166073	0.0705012	MCTP2;SYN3;SV2C;DRD2;SNAP25;NTF3;RAB5A;VAMP2;PDE4B
GO:0033267	axon part	374	14	5.63253	2.48556	0.0016754	0.0705012	CNR1;SIGMAR1;GPER1;DRD2;KIF21B;SNAP25;TSHZ3;RAB5A;NPTXR;ADORA2A;SOD1;MYH14;INPP5J;SSH1
GO:0098889	intrinsic component of presynaptic membrane	84	6	1.26506	4.74286	0.00168003	0.0705012	CNR1;DRD2;KCNJ3;ADORA2A;CDH2;CHRNA6
GO:0030424	axon	595	19	8.96084	2.12034	0.00175274	0.0710161	CNR1;SIGMAR1;GPER1;DRD2;KIF21B;SNAP25;TSHZ3;AVIL;HPCA;NTF3;RAB5A;NPTXR;ADORA2A;SLC38A2;SOD1;MYH14;INPP5J;KCNC3;SSH1
GO:0032133	chromosome passenger complex	5	2	0.0753012	26.56	0.00219287	0.0818284	CDCA8;BIRC5
GO:0042719	mitochondrial intermembrane space protein transporter complex	5	2	0.0753012	26.56	0.00219287	0.0818284	TIMM8B;TIMM13
GO:0036126	sperm flagellum	89	6	1.34036	4.4764	0.00225683	0.0818284	DRD2;TACR1;CFAP69;WBP2NL;PMFBP1;AK2
GO:0097060	synaptic membrane	430	15	6.4759	2.31628	0.00229816	0.0818284	F2R;CNR1;SIGMAR1;GPER1;KCNMA1;DRD2;SNAP25;KCNJ3;PSD3;ADORA2A;CDH2;KCNC3;LZTS1;GABRR3;CHRNA6
GO:0097458	neuron part	1690	40	25.4518	1.5716	0.00270839	0.09335	MCTP2;HRH2;CNR1;SIGMAR1;SYN3;SV2C;GPER1;DRD2;KIF21B;SNAP25;TSHZ3;AVIL;KCNJ3;HPCA;EPHA6;NTF3;RAB5A;BCL11A;TSC2;NPTXR;CD22;TRPA1;PSD3;ADORA2A;SLC38A2;SOD1;MYH14;CDH2;INPP5J;KCNC3;LZTS1;EPHA1;VAMP2;TENM1;ADD1;GABRR3;ADCY2;SSH1;PDE4B;CHRNA6
GO:0098793	presynapse	483	16	7.2741	2.19959	0.00278064	0.09335	MCTP2;CNR1;SYN3;SV2C;GPER1;DRD2;SNAP25;KCNJ3;NTF3;RAB5A;ADORA2A;CDH2;KCNC3;VAMP2;PDE4B;CHRNA6
GO:0097729	9+2 motile cilium	94	6	1.41566	4.2383	0.00297157	0.0969889	DRD2;TACR1;CFAP69;WBP2NL;PMFBP1;AK2
GO:0070382	exocytic vesicle	197	9	2.96687	3.0335	0.00305772	0.0971012	MCTP2;SYN3;SV2C;DRD2;SNAP25;NTF3;RAB5A;VAMP2;PDE4B
GO:0014069	postsynaptic density	316	12	4.75904	2.52152	0.00314029	0.0971012	SIGMAR1;SYN3;GPER1;DRD2;BCL11A;TSC2;PSD3;ADORA2A;CDH2;LZTS1;ADD1;PDE4B
GO:0032279	asymmetric synapse	320	12	4.81928	2.49	0.00347428	0.104674	SIGMAR1;SYN3;GPER1;DRD2;BCL11A;TSC2;PSD3;ADORA2A;CDH2;LZTS1;ADD1;PDE4B
GO:0030672	synaptic vesicle membrane	102	6	1.53614	3.90588	0.00444998	0.12753	MCTP2;SYN3;SV2C;DRD2;RAB5A;VAMP2
GO:0099501	exocytic vesicle membrane	102	6	1.53614	3.90588	0.00444998	0.12753	MCTP2;SYN3;SV2C;DRD2;RAB5A;VAMP2
GO:0099572	postsynaptic specialization	340	12	5.12048	2.34353	0.0056006	0.156556	SIGMAR1;SYN3;GPER1;DRD2;BCL11A;TSC2;PSD3;ADORA2A;CDH2;LZTS1;ADD1;PDE4B
GO:0098984	neuron to neuron synapse	341	12	5.13554	2.33666	0.00572928	0.156556	SIGMAR1;SYN3;GPER1;DRD2;BCL11A;TSC2;PSD3;ADORA2A;CDH2;LZTS1;ADD1;PDE4B
GO:0043256	laminin complex	8	2	0.120482	16.6	0.00595918	0.157547	LAMC1;LAMB1
GO:0098590	plasma membrane region	1175	29	17.6958	1.63881	0.00603373	0.157547	F2R;CNR1;SIGMAR1;NHS;GPER1;KCNMA1;DRD2;SNAP25;SCARB1;KCNJ3;ITGA9;HPCA;VASP;PSD3;ADORA2A;DLC1;CLDN6;SPRED1;PLB1;CDH2;KCNC3;LZTS1;ADD1;GABRR3;CADM1;SSH1;TGFBR2;VSIG1;CHRNA6
GO:0043005	neuron projection	1288	31	19.3976	1.59814	0.00651742	0.166478	HRH2;CNR1;SIGMAR1;SV2C;GPER1;DRD2;KIF21B;SNAP25;TSHZ3;AVIL;HPCA;EPHA6;NTF3;RAB5A;NPTXR;ADORA2A;SLC38A2;SOD1;MYH14;CDH2;INPP5J;KCNC3;LZTS1;EPHA1;VAMP2;TENM1;GABRR3;ADCY2;SSH1;PDE4B;CHRNA6
GO:0005758	mitochondrial intermembrane space	79	5	1.18976	4.20253	0.00679814	0.169954	STOML2;TIMM8B;SOD1;TIMM13;AK2
GO:0044430	cytoskeletal part	1621	37	24.4127	1.51561	0.00702568	0.171415	CEP135;CLIP2;SPICE1;CDCA8;GPER1;INTU;PLS1;SLC16A1;KIF21B;SPAG17;SRPRB;CDC20;CLUAP1;BCL10;SPEF1;ACTR3B;RASSF5;DNAH2;CDK5RAP2;ADORA2A;DLC1;PDLIM7;CCDC116;HSPB11;MYH14;SPECC1;ACKR2;CFAP221;CDH2;BIRC5;ABLIM3;MAD2L1;ADD1;KRT86;HFE;PDE4B;RILP
GO:0030027	lamellipodium	187	8	2.81627	2.84064	0.00752702	0.171415	NHS;SLC39A14;VASP;SH3BP1;CDH2;ABLIM3;SSH1;ARAP3
GO:0032809	neuronal cell body membrane	27	3	0.406627	7.37778	0.00756257	0.171415	HPCA;CD22;KCNC3
GO:0044298	cell body membrane	27	3	0.406627	7.37778	0.00756257	0.171415	HPCA;CD22;KCNC3
GO:0044327	dendritic spine head	9	2	0.135542	14.7556	0.00758601	0.171415	GPER1;HPCA
GO:0005783	endoplasmic reticulum	1861	41	28.0271	1.46287	0.00825016	0.182904	EVA1A;SEZ6L2;EXT1;FCRLB;COL5A3;SIGMAR1;RNF121;GPER1;STT3A;CD320;PSMG1;PIGF;SRPRB;GOSR2;PRDX4;EI24;LAMC1;EPM2AIP1;HYOU1;CES2;BACE2;PTPN1;FAM57B;MLEC;NCLN;LAMB1;CLEC2D;TPST2;MATN3;ANO5;CDH2;CYP8B1;PCDHA1;TENM1;LRRC59;SLC35G1;MGLL;HHAT;SGMS2;GANAB;SEC61A1
GO:0031970	organelle envelope lumen	87	5	1.31024	3.81609	0.0101205	0.218828	STOML2;TIMM8B;SOD1;TIMM13;AK2
GO:0044432	endoplasmic reticulum part	1332	31	20.0602	1.54535	0.0103288	0.218828	EVA1A;SEZ6L2;EXT1;COL5A3;SIGMAR1;RNF121;GPER1;STT3A;PIGF;SRPRB;GOSR2;EI24;LAMC1;HYOU1;CES2;PTPN1;FAM57B;MLEC;NCLN;LAMB1;MATN3;ANO5;CDH2;CYP8B1;LRRC59;SLC35G1;MGLL;HHAT;SGMS2;GANAB;SEC61A1
GO:0030658	transport vesicle membrane	198	8	2.98193	2.68283	0.0104292	0.218828	MCTP2;SYN3;SV2C;DRD2;GOSR2;SLC30A8;RAB5A;VAMP2
GO:0032589	neuron projection membrane	57	4	0.858434	4.65965	0.0106368	0.219266	GPER1;HPCA;ADORA2A;KCNC3
GO:0008076	voltage-gated potassium channel complex	89	5	1.34036	3.73034	0.0110986	0.222506	KCNMA1;SNAP25;KCNJ3;KCNC3;VAMP2
GO:0097525	spliceosomal snRNP complex	58	4	0.873494	4.57931	0.0112926	0.222506	DDX23;SNRNP40;LSM7;PRPF3
GO:0061827	sperm head	11	2	0.165663	12.0727	0.011362	0.222506	TACR1;WBP2NL
GO:0070160	tight junction	126	6	1.89759	3.1619	0.0121019	0.231152	CCND1;ILDR1;NHS;VASP;SH3BP1;CLDN6
GO:1990351	transporter complex	332	11	5	2.2	0.012197	0.231152	KCNMA1;TIMM8B;SNAP25;KCNJ3;CACNA2D2;TIMM13;KCNC3;VAMP2;GABRR3;PDE4B;CHRNA6
GO:0071005	U2-type precatalytic spliceosome	33	3	0.496988	6.03636	0.0132045	0.242427	LSM7;PRPF3;PRPF38A
GO:0071011	precatalytic spliceosome	33	3	0.496988	6.03636	0.0132045	0.242427	LSM7;PRPF3;PRPF38A
GO:0031256	leading edge membrane	169	7	2.54518	2.7503	0.0142432	0.255014	GPER1;HPCA;VASP;PSD3;ADORA2A;DLC1;KCNC3
GO:0001772	immunological synapse	34	3	0.512048	5.85882	0.0143242	0.255014	GZMA;STOML2;BCL10
GO:0098691	dopaminergic synapse	13	2	0.195783	10.2154	0.0157975	0.272972	DRD2;CHRNA6
GO:0032591	dendritic spine membrane	13	2	0.195783	10.2154	0.0157975	0.272972	GPER1;KCNC3
GO:0034705	potassium channel complex	98	5	1.4759	3.38776	0.0162986	0.274009	KCNMA1;SNAP25;KCNJ3;KCNC3;VAMP2
GO:0044441	ciliary part	440	13	6.62651	1.96182	0.016324	0.274009	INTU;DRD2;SPAG17;TACR1;CLUAP1;SPEF1;CFAP69;DNAH2;HSPB11;CFAP221;PMFBP1;RILP;AK2
GO:0030532	small nuclear ribonucleoprotein complex	65	4	0.978916	4.08615	0.0166148	0.274963	DDX23;SNRNP40;LSM7;PRPF3
GO:0000786	nucleosome	67	4	1.00904	3.96418	0.0183793	0.29994	HIST1H2AD;HIST1H2BJ;H2AFZ;HIST2H2BF
GO:0032432	actin filament bundle	68	4	1.0241	3.90588	0.0193035	0.310707	PLS1;PDLIM7;MYH14;ABLIM3
GO:0032590	dendrite membrane	40	3	0.60241	4.98	0.0221461	0.347515	GPER1;HPCA;KCNC3
GO:0030425	dendrite	608	16	9.15663	1.74737	0.0221818	0.347515	HRH2;GPER1;DRD2;KIF21B;HPCA;NTF3;RAB5A;NPTXR;ADORA2A;SLC38A2;SOD1;INPP5J;KCNC3;LZTS1;ADCY2;PDE4B
GO:0097447	dendritic tree	610	16	9.18675	1.74164	0.0227841	0.352255	HRH2;GPER1;DRD2;KIF21B;HPCA;NTF3;RAB5A;NPTXR;ADORA2A;SLC38A2;SOD1;INPP5J;KCNC3;LZTS1;ADCY2;PDE4B
GO:0005682	U5 snRNP	16	2	0.240964	8.3	0.023595	0.360054	DDX23;SNRNP40
GO:0045211	postsynaptic membrane	321	10	4.83434	2.06854	0.0240464	0.362237	F2R;SIGMAR1;KCNMA1;DRD2;PSD3;ADORA2A;CDH2;LZTS1;GABRR3;CHRNA6
GO:0030864	cortical actin cytoskeleton	75	4	1.12952	3.54133	0.0265748	0.383398	PLS1;DLC1;CDH2;HFE
GO:0044815	DNA packaging complex	75	4	1.12952	3.54133	0.0265748	0.383398	HIST1H2AD;HIST1H2BJ;H2AFZ;HIST2H2BF
GO:0120114	Sm-like protein family complex	75	4	1.12952	3.54133	0.0265748	0.383398	DDX23;SNRNP40;LSM7;PRPF3
GO:0030133	transport vesicle	374	11	5.63253	1.95294	0.0267563	0.383398	MCTP2;SYN3;SV2C;DRD2;SNAP25;GOSR2;SLC30A8;NTF3;RAB5A;VAMP2;PDE4B
GO:0009986	cell surface	782	19	11.7771	1.6133	0.0278781	0.394659	F2R;IL27RA;INTU;SCARB1;KCNJ3;IL2RB;BACE2;LPL;CD22;CPM;SFRP1;CLEC2D;ADAMTS15;ACKR2;CDH2;CDH20;TGFBR2;HFE;IL2RA
GO:0005684	U2-type spliceosomal complex	77	4	1.15964	3.44935	0.0289151	0.404467	SNRNP40;LSM7;PRPF3;PRPF38A
GO:0099699	integral component of synaptic membrane	154	6	2.31928	2.58701	0.0292769	0.404711	CNR1;DRD2;KCNJ3;ADORA2A;CDH2;CHRNA6
GO:0031253	cell projection membrane	335	10	5.04518	1.98209	0.0309837	0.423324	GPER1;DRD2;SCARB1;HPCA;VASP;PSD3;ADORA2A;DLC1;PLB1;KCNC3
GO:0031201	SNARE complex	47	3	0.707831	4.2383	0.0336774	0.448556	SNAP25;GOSR2;VAMP2
GO:0005912	adherens junction	538	14	8.10241	1.72788	0.0338181	0.448556	FOCAD;NHS;TMEM47;TGFB1I1;HYOU1;ARL14EP;VASP;SH3BP1;CNN1;DLC1;PDLIM7;CDH2;CDH20;ADD1
GO:0005929	cilium	590	15	8.88554	1.68814	0.034138	0.448556	INTU;DRD2;SPAG17;TACR1;CLUAP1;SPEF1;CFAP69;DNAH2;ALS2CR12;HSPB11;CFAP221;WBP2NL;PMFBP1;RILP;AK2
GO:0005911	cell-cell junction	441	12	6.64157	1.8068	0.0356296	0.448556	CCND1;ILDR1;NHS;TMEM47;VASP;SH3BP1;CLDN6;PDLIM7;CDH2;CDH20;ADD1;CADM1
GO:0031045	dense core granule	20	2	0.301205	6.64	0.0359194	0.448556	BACE2;SOD1
GO:0035371	microtubule plus-end	20	2	0.301205	6.64	0.0359194	0.448556	CLIP2;CDK5RAP2
GO:0000930	gamma-tubulin complex	20	2	0.301205	6.64	0.0359194	0.448556	CDK5RAP2;PDE4B
GO:0030992	intraciliary transport particle B	20	2	0.301205	6.64	0.0359194	0.448556	CLUAP1;HSPB11
GO:0005923	bicellular tight junction	121	5	1.82229	2.7438	0.0362662	0.448556	CCND1;NHS;VASP;SH3BP1;CLDN6
GO:0044420	extracellular matrix component	49	3	0.737952	4.06531	0.0374437	0.458295	COL5A3;LAMC1;LAMB1
GO:0034702	ion channel complex	300	9	4.51807	1.992	0.0384854	0.46619	KCNMA1;SNAP25;KCNJ3;CACNA2D2;KCNC3;VAMP2;GABRR3;PDE4B;CHRNA6
GO:0043197	dendritic spine	165	6	2.48494	2.41455	0.0390029	0.4666	GPER1;DRD2;HPCA;KCNC3;LZTS1;PDE4B
GO:0005732	small nucleolar ribonucleoprotein complex	21	2	0.316265	6.32381	0.0393136	0.4666	SNRNP40;NOLC1
GO:0099240	intrinsic component of synaptic membrane	166	6	2.5	2.4	0.0399774	0.469735	CNR1;DRD2;KCNJ3;ADORA2A;CDH2;CHRNA6
